# Supplementary material for: Molecular and supported ruthenium complexes as photoredox oxidation catalysts in water
Source: Royal Society of Chemistry journal article supplement (doi:10.1039/d2qi01504h), 2022-01-01

## SUPPORTING INFORMATION

# Molecular and Supported Ruthenium Complexes as Photoredox Oxidation Catalysts in Water

*Enric Clerich,<sup>a</sup> Syrine Affès,<sup>a</sup> Enriqueta Anticó,<sup>a</sup> Xavier Fontrodona,<sup>a</sup> Francesc Teixidor<sup>b</sup> and Isabel Romero<sup>\*a</sup>*

<sup>a</sup> Departament de Química and Serveis Tècnics de Recerca, Universitat de Girona, C/ M. Aurèlia Campmany, 69, E-17003 Girona, Spain.

<sup>b</sup> Institut de Ciència de Materials de Barcelona, ICMAB-CSIC, Campus UAB, E-08193 Bellaterra, Spain.

**Table S1.** Crystallographic data for the X-ray diffraction of the *trans-2* and *cis-2* complexes.

**Table S2.** Selected bond lengths (Å) and angles (°) for of the *trans-2* and *cis-2* complexes.

**Figure S1.** Packing arrangement for isomer a) *trans-2* and b) *cis-2*.

**Figure S2.** IR spectra of a) *pyrz-pyr*; b) *trans-2* and *cis-2*; c) *trans-3*.

**Figure S3.** NMR spectra of *pyrz-pyr* (400 MHz, CD<sub>2</sub>Cl<sub>2</sub>): a) <sup>1</sup>H-NMR; b) <sup>13</sup>C-NMR; c) COSY; d) NOESY; e) <sup>1</sup>H-<sup>13</sup>C HSQC.

**Figure S4.** NMR spectra of *trans-2*, 400 MHz, CD<sub>6</sub>CO: a) DEPT b) COSY; c) NOESY; d) EXSY; e) HMBC H,N; f) HMBC; g) HSQC.

**Figure S5.** NMR spectra of *cis-2*, 400 MHz CD<sub>6</sub>CO: a) <sup>13</sup>C-NMR; b) DEPT; c) COSY; d) NOESY; e) TOCSY; f) HMBC; g) HSQC.

**Figure S6.** NMR spectra of *trans-3*, 400 MHz, MeOD: a) <sup>1</sup>H-NMR.

**Figure S7.** UV/Vis spectra of *trans-2* (solid line), *cis-2* (dotted line) in CH<sub>2</sub>Cl<sub>2</sub> and *trans-3* (dashed line in phosphate buffer (pH=6.8)

**Figure S8.** CV of a) ligand *pyrz-pyr* in CH<sub>2</sub>Cl<sub>2</sub> containing 0.1 M *n*-Bu<sub>4</sub>NPF<sub>6</sub> (TBAH) vs SCE.and b) *trans-3* in phosphate buffer (pH=6.8); c) DPV of *trans-3*.

**Figure S9.** IR spectra of a) rGO (orange) and b) rGO@*trans-3* (blue).

**Figure S10.** SEM images of a) rGO support and b) rGO@*trans-3*.

**Figure S11.** DPV of rGO@*trans-2* in in CH<sub>2</sub>Cl<sub>2</sub> containing 0.1 M *n*-Bu<sub>4</sub>NPF<sub>6</sub> (TBAH) vs SCE.

**Figure S12.** Plot of yield as a function of time for the photoredox catalysis of 1-benzylalcohol using rGO-*trans-3* as photocatalyst. The blue curve shows the substract yield after 3h and 6 h of reaction time in presence of catalyst. The red curve shows the dependence of substract yield with the reaction time after the catalyst was removed at 3h. Conditions: rGO-*trans-3* (0,25 mM), substrate (25 mM ), Na<sub>2</sub>S<sub>2</sub>O<sub>8</sub> (75 mM), 3ml water (phosphate buffer pH 6.8), 6h h of catalysis at RT. light irradiation using a lamp with λ= 400-700 nm.

**Table S1.** Crystallographic data for the X-ray diffraction of the *trans-2* and *cis-2* complexes.

|                                           | <i>trans-2</i>                                                                                         | <i>cis-2</i>                                                        |
|-------------------------------------------|--------------------------------------------------------------------------------------------------------|---------------------------------------------------------------------|
| Empirical formula                         | C <sub>40</sub> H <sub>28</sub> ClF <sub>6</sub> N <sub>6</sub> PRu.7/4CH <sub>2</sub> Cl <sub>2</sub> | C <sub>40</sub> H <sub>28</sub> ClF <sub>6</sub> N <sub>6</sub> PRu |
| Formula weight                            | 1026.42 g/mol                                                                                          | 874.17 g/mol                                                        |
| Crystal system                            | monoclinic                                                                                             | tetragonal                                                          |
| Space group                               | P 1 21/n 1                                                                                             | P 4/n n c                                                           |
| a[Å]                                      | 15.550(9)                                                                                              | 17.9714(15)                                                         |
| b[Å]                                      | 16.801(7)                                                                                              | 17.9714(15)                                                         |
| c[Å]                                      | 16.104(8)                                                                                              | 49.745(9)                                                           |
| α[°]                                      | 90                                                                                                     | 90                                                                  |
| β[°]                                      | 103.032(19)                                                                                            | 90                                                                  |
| γ[°]                                      | 90                                                                                                     | 90                                                                  |
| V [Å <sup>3</sup> ]                       | 4099.(3)                                                                                               | 16066.(4)                                                           |
| Formula Units/ cell                       | 1                                                                                                      | 16                                                                  |
| Temp. [K]                                 | 100(2)                                                                                                 | 100(2)                                                              |
| ρ <sub>calc</sub> , [g/cm <sup>-3</sup> ] | 1.657                                                                                                  | 1.446                                                               |
| μ[mm <sup>-1</sup> ]                      | 0.783                                                                                                  | 0.561                                                               |
| Final R indices,<br>[I>2σ(I)]             | R <sub>1</sub> = 0.0542<br>wR <sub>2</sub> = 0.1274                                                    | R <sub>1</sub> = 0.1125<br>wR <sub>2</sub> = 0.2311                 |
| R indices [all data]                      | R <sub>1</sub> = 0.0632<br>wR <sub>2</sub> = 0.1369                                                    | R <sub>1</sub> = 0.1334<br>wR <sub>2</sub> = 0.2469                 |

$$R_1 = \frac{\sum ||F_o| - |F_c||}{\sum |F_o|}$$

$$wR_2 = \left[ \frac{\sum \{w(F_o^2 - F_c^2)^2\}}{\sum \{w(F_o^2)^2\}} \right]^{1/2}, \text{ where } w = 1/[\sigma^2(F_o^2) + (0.0042P)^2] \text{ and } P = (F_o^2 + 2F_c^2)$$

**Table S2.** Selected bond lengths (Å) and angles (°) for of the *trans-2* and *cis-2* complexes.

|                  | <i>trans-2</i> | <i>cis-2</i> |
|------------------|----------------|--------------|
| Ru(1)-N(1)       | 2.099(3)       | 2.065(8)     |
| Ru(1)-N(2)       | 2.056(3)       | 2.110(9)     |
| Ru(1)-N(4)       | 2.069(3)       | 2.039(6)     |
| Ru(1)-N(5)       | 1.954(3)       | 1.923(5)     |
| Ru(1)-N(6)       | 2.063(3)       | 2.063(9)     |
| Ru(1)-Cl(1)      | 2.3969(12)     | 2.417(3)     |
| N(5)-Ru(1)-N(2)  | 103.02(11)     | 174.3(3)     |
| N(2)-Ru(1)-N(6)  | 94.17(11)      | 100.5(4)     |
| N(2)-Ru(1)-N(4)  | 90.31(11)      | 99.8(3)      |
| N(5)-Ru(1)-N(1)  | 174.96(11)     | 96.9(3)      |
| N(6)-Ru(1)-N(1)  | 94.61(11)      | 93.6(3)      |
| N(5)-Ru(1)-Cl(1) | 86.31(8)       | 85.4(2)      |
| N(6)-Ru(1)-Cl(1) | 89.78(8)       | 89.6(2)      |
| N(1)-Ru(1)-Cl(1) | 93.82(8)       | 176.3(2)     |
| N(5)-Ru(1)-N(6)  | 80.35(12)      | 79.6(3)      |
| N(5)-Ru(1)-N(4)  | 79.63(12)      | 79.9(3)      |
| N(6)-Ru(1)-N(4)  | 159.99(11)     | 159.5(3)     |
| N(2)-Ru(1)-N(1)  | 77.11(11)      | 77.5(3)      |
| N(4)-Ru(1)-N(1)  | 105.40(12)     | 88.1(3)      |
| N(2)-Ru(1)-Cl(1) | 170.35(8)      | 100.3(2)     |
| N(4)-Ru(1)-Cl(1) | 88.95(8)       | 89.5(2)      |

**Figure S1.** Packing arrangement for isomer a) *trans*-2 and b) *cis*-2.

a)

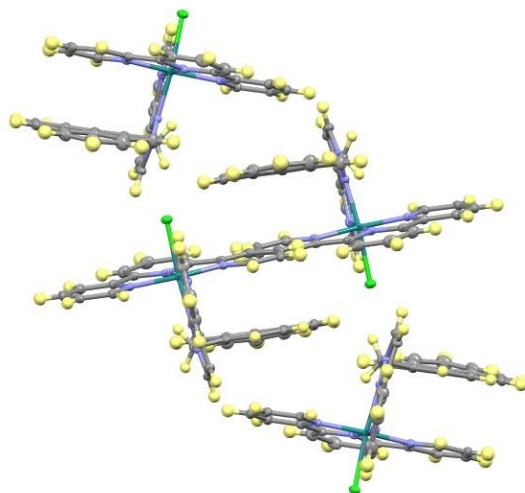

b)

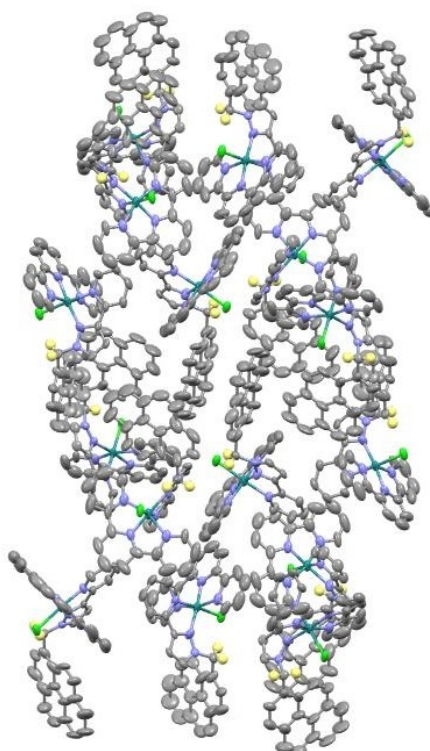

**Figure S2.** IR spectra of a) *pypz-pyr*; b) *trans-2* and *cis-2*; c) *trans-3*.

a)

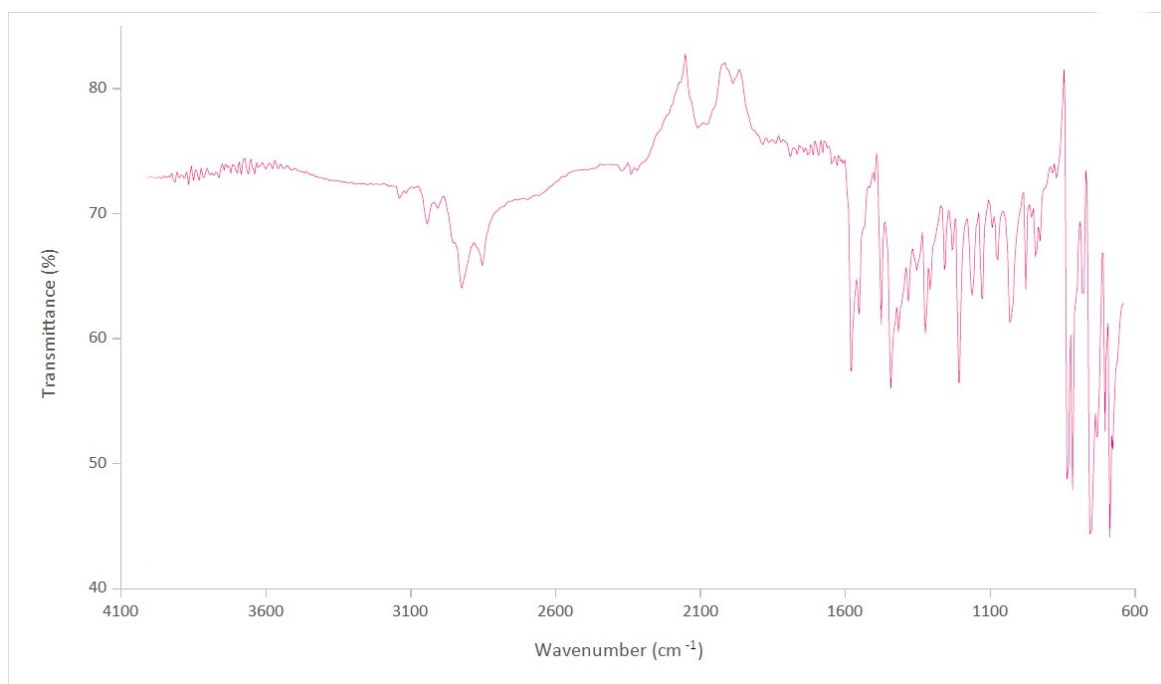

b)

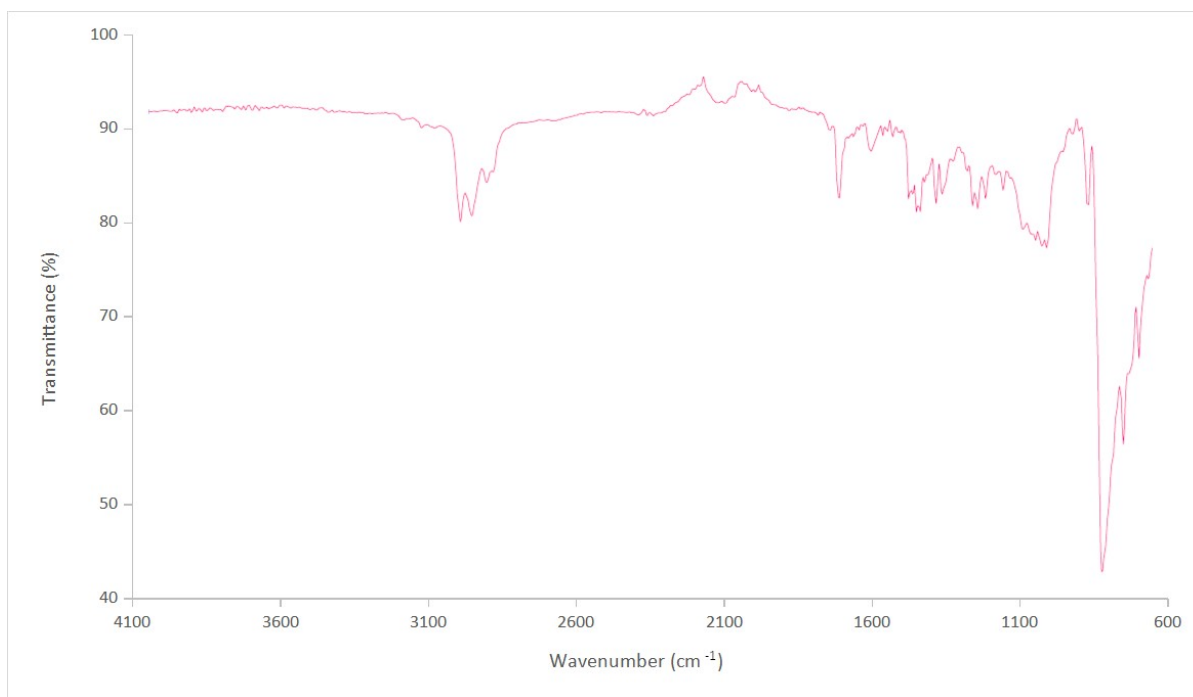

c)

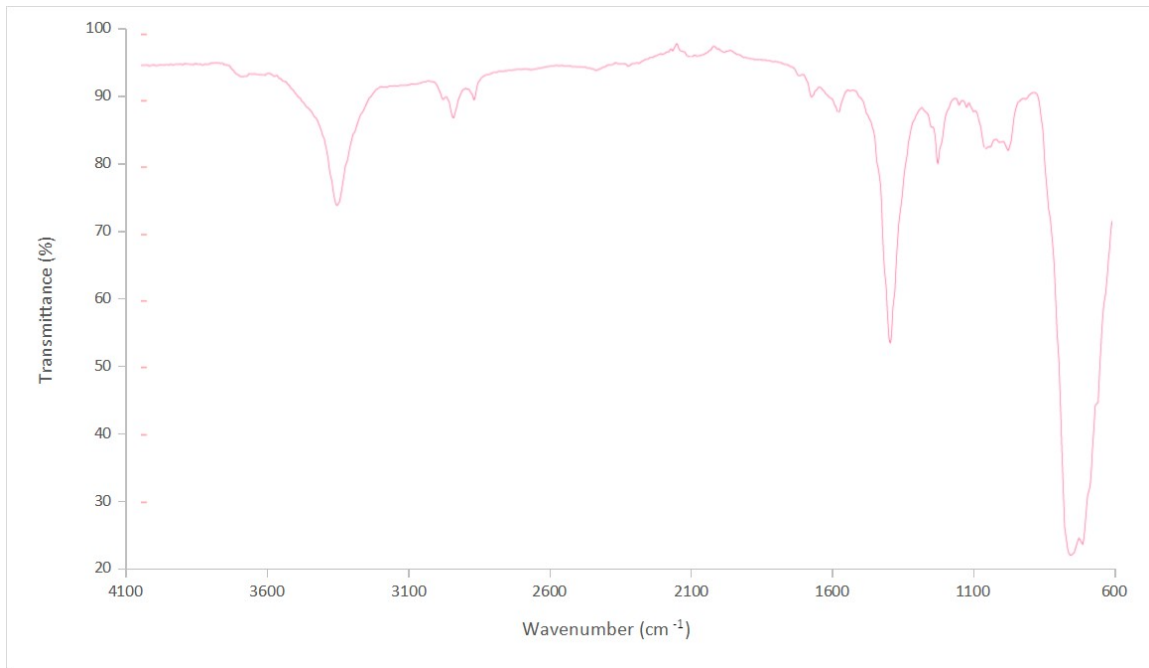

**Figure S3.** NMR spectra of *pypz-pyr* (400 MHz, CD<sub>2</sub>Cl<sub>2</sub>): a) <sup>1</sup>H-NMR; b) <sup>13</sup>C-NMR; c) COSY; d) NOESY; e) <sup>1</sup>H-<sup>13</sup>C HSQC.

a)

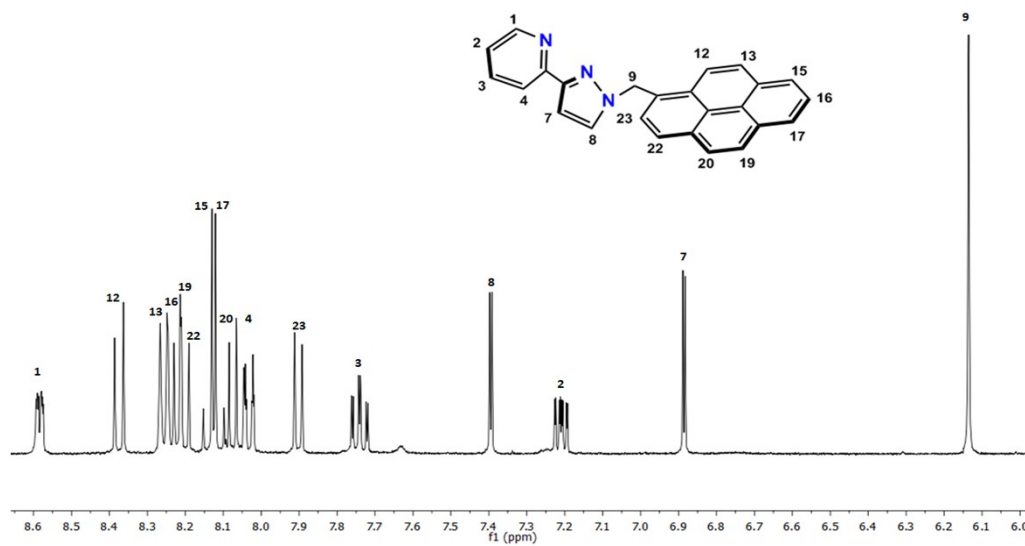

b)

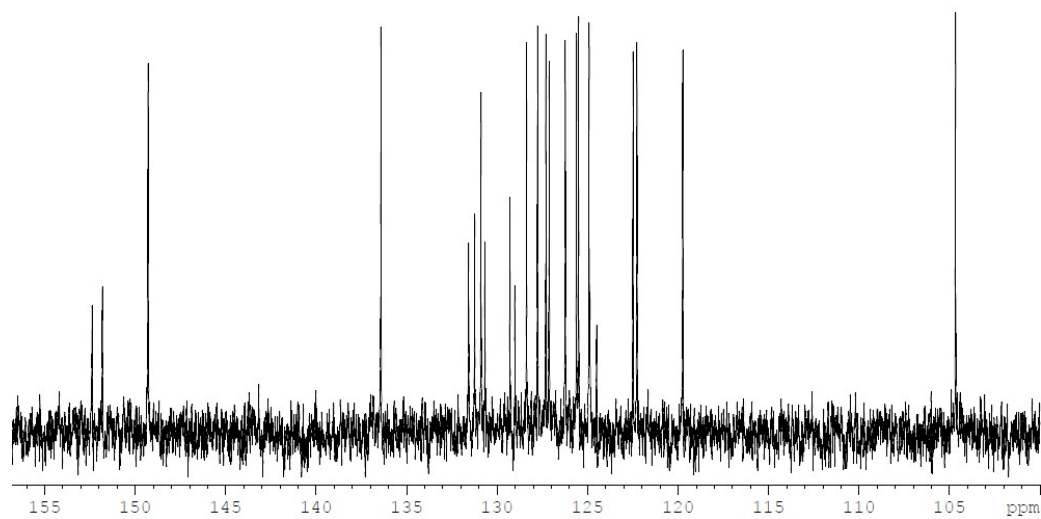



c)

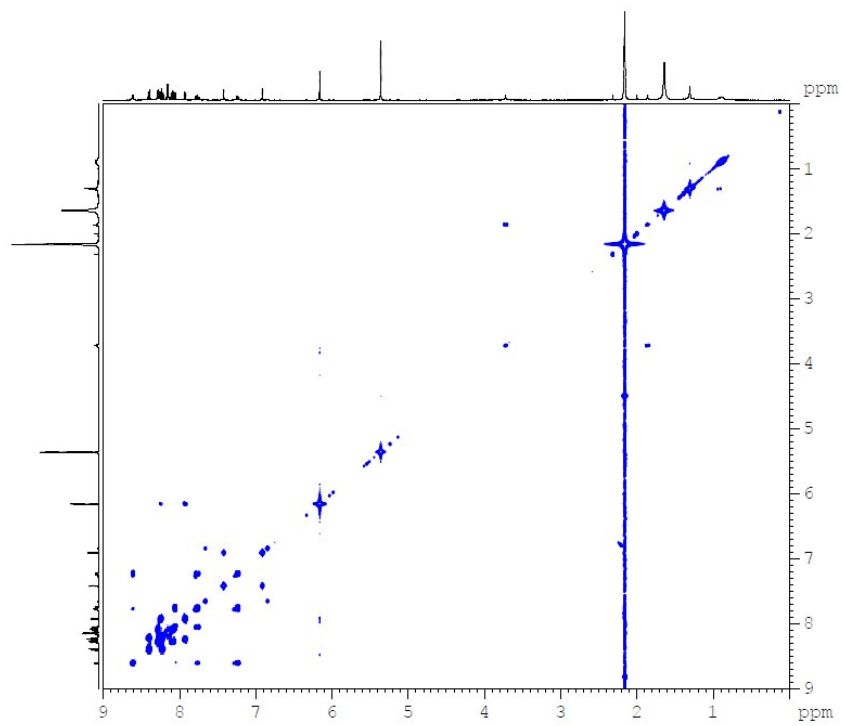

d)

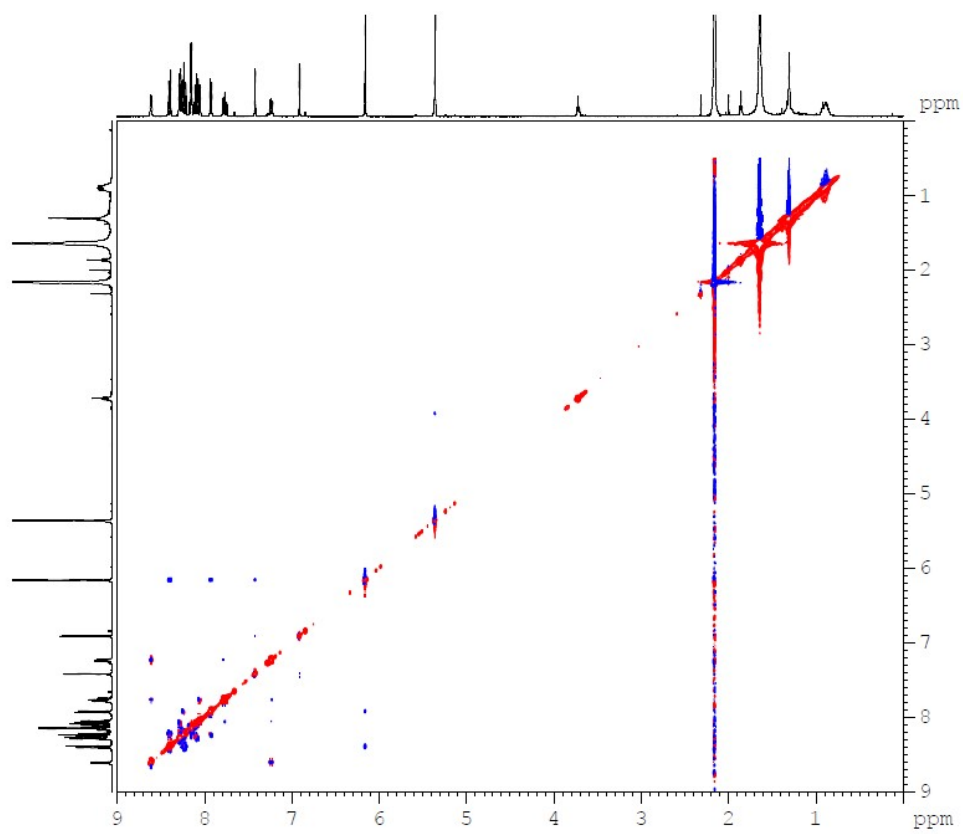

e)

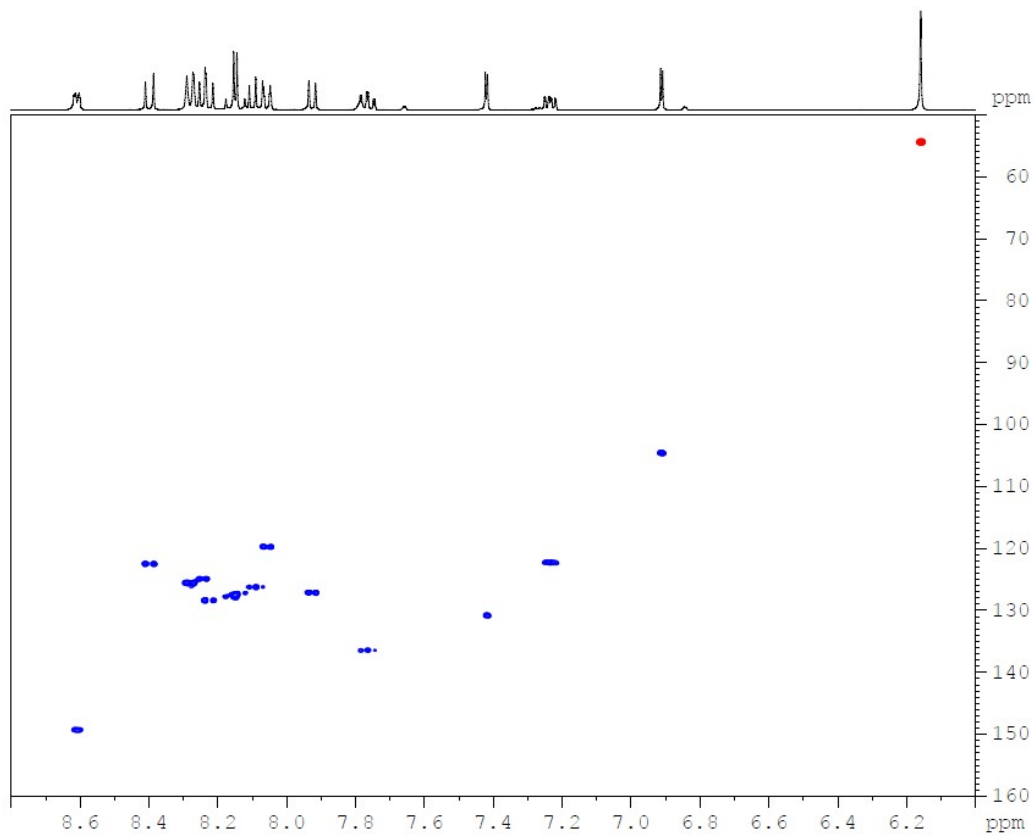

**Figure S4.** NMR spectra of *trans*-2, 400 MHz, CD<sub>6</sub>CO: a) DEPT b) COSY; c) NOESY; d) EXSY; e) HMBC H,N; f) HMBC H,C; g) HSQC H,C

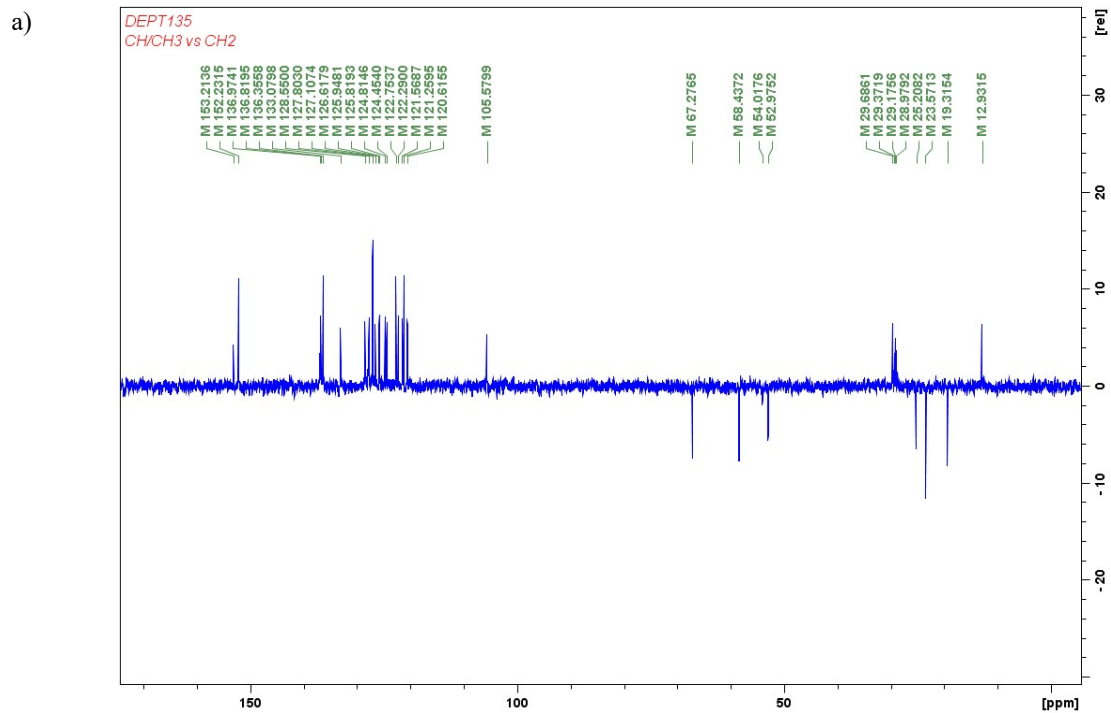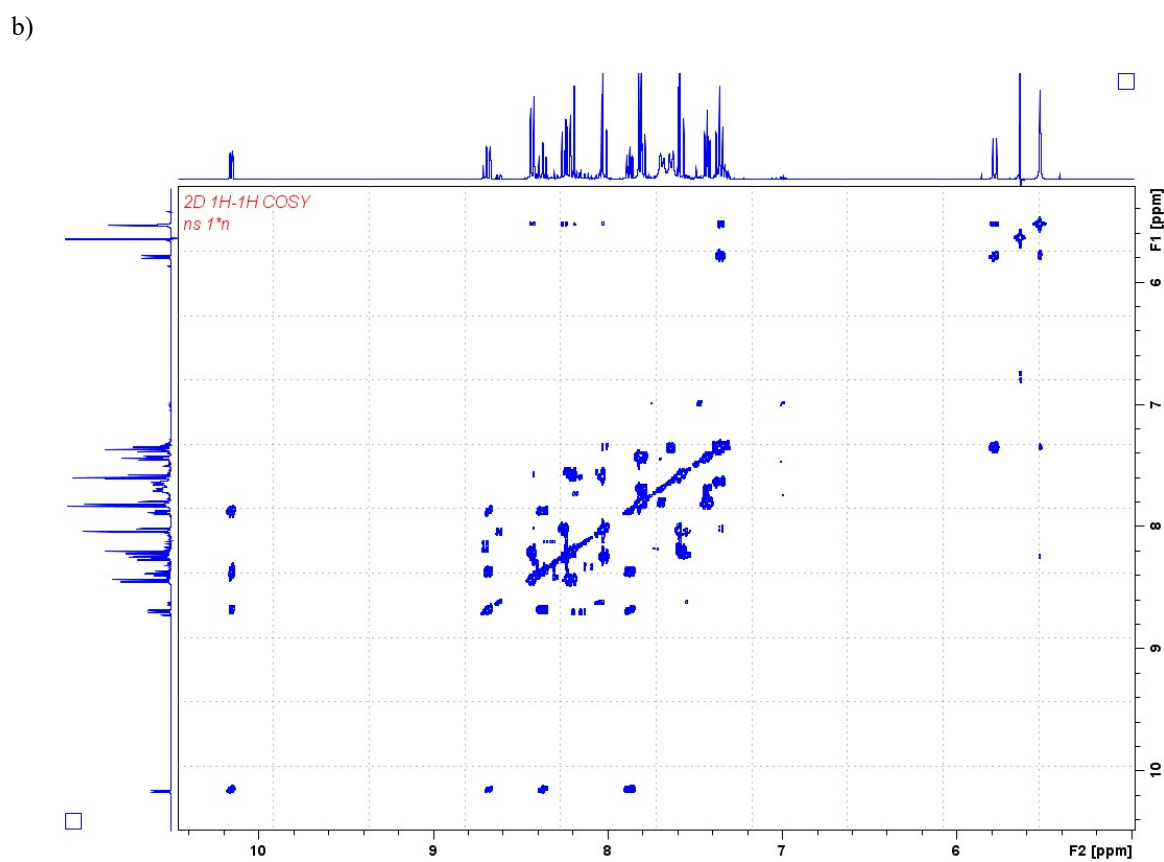

c)

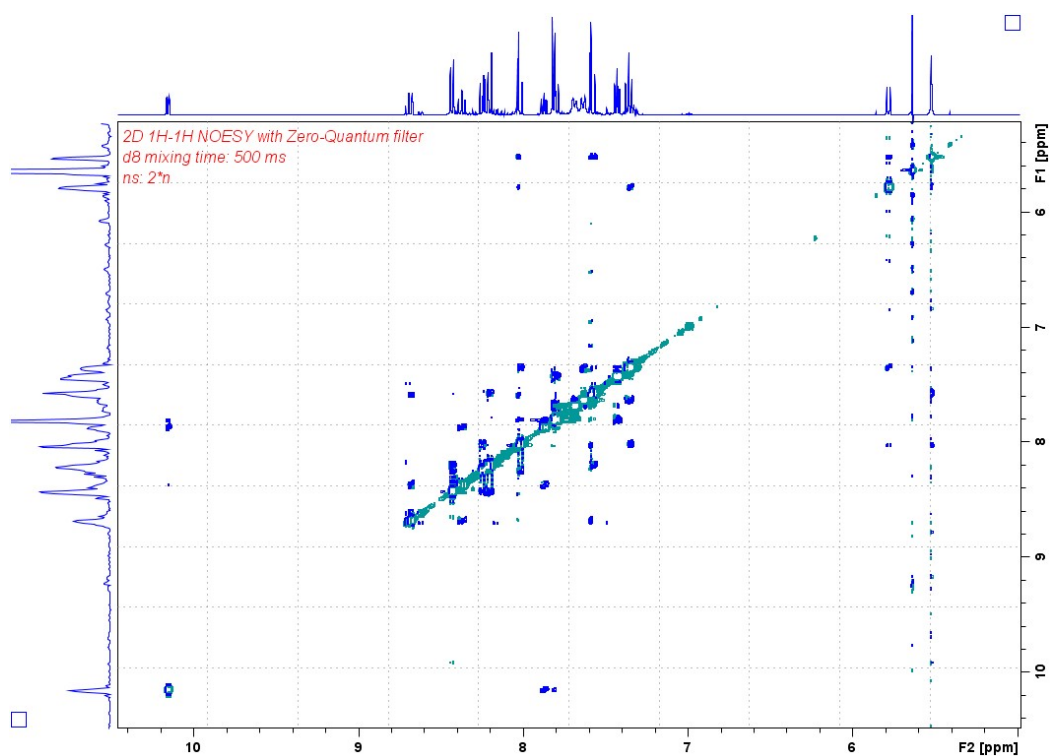

d)

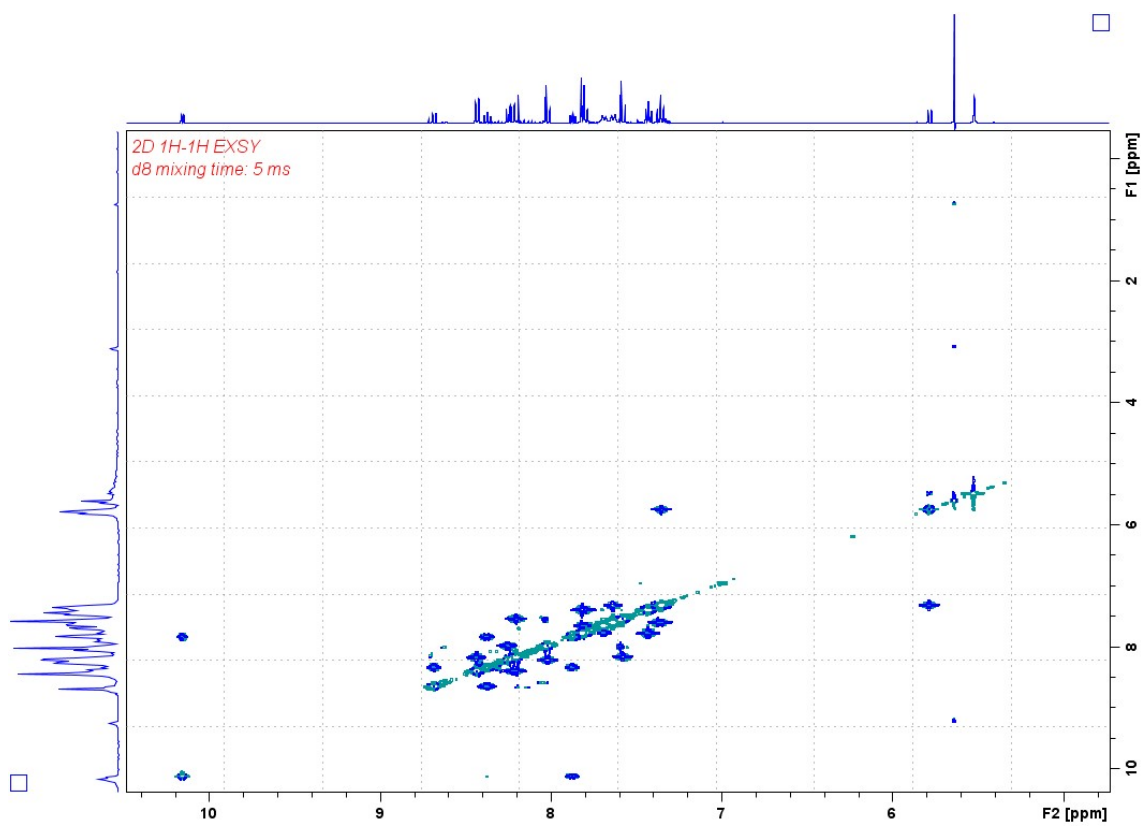

e)

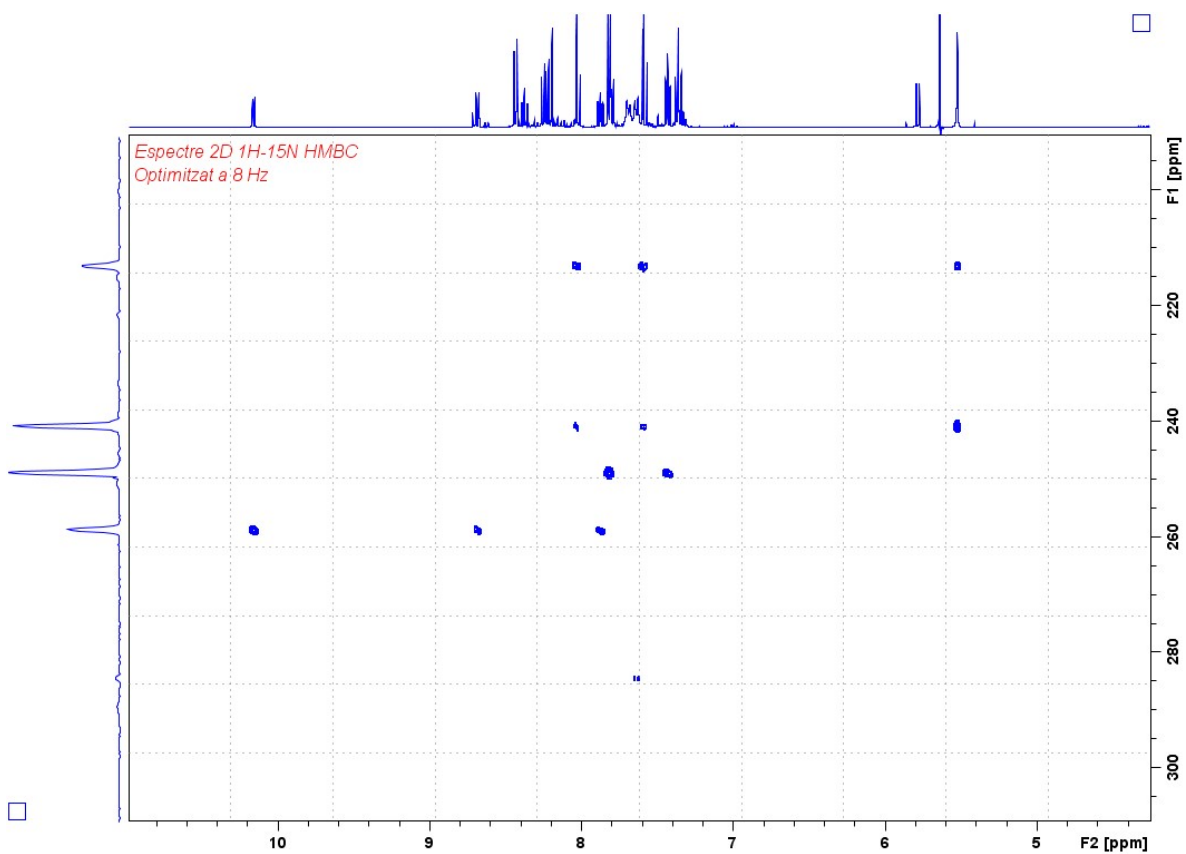

f)

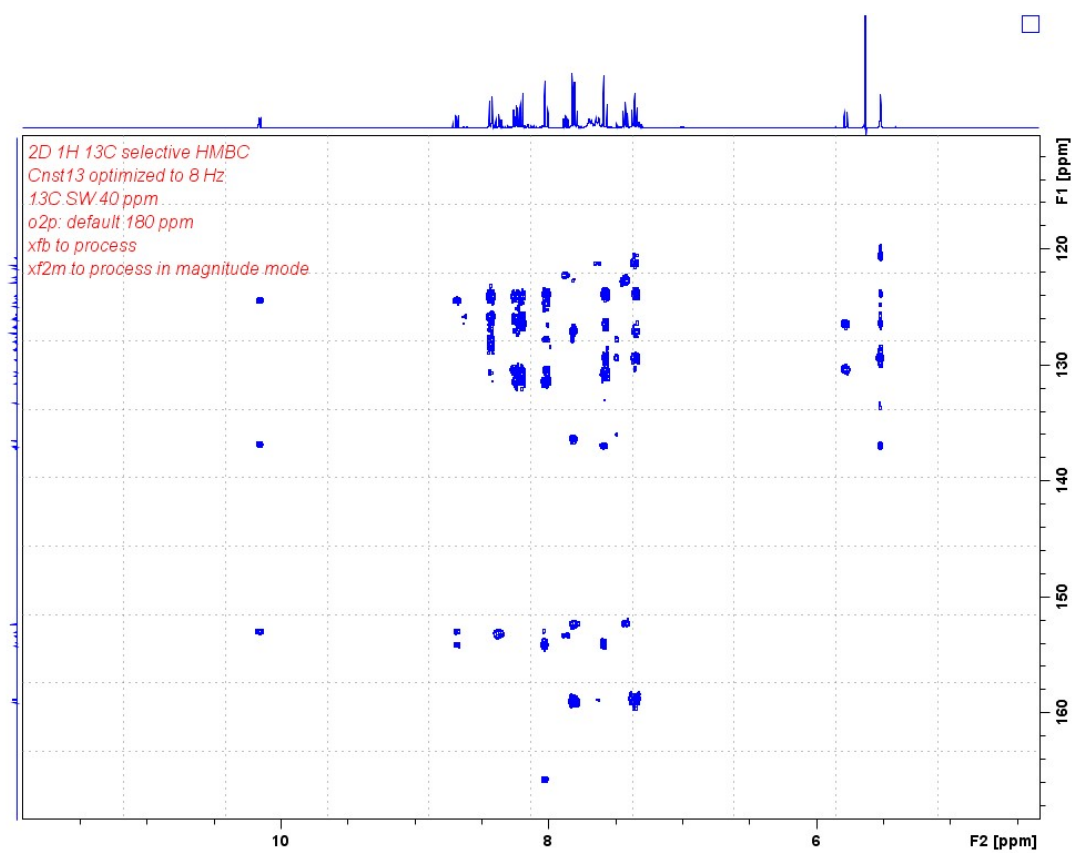

g)

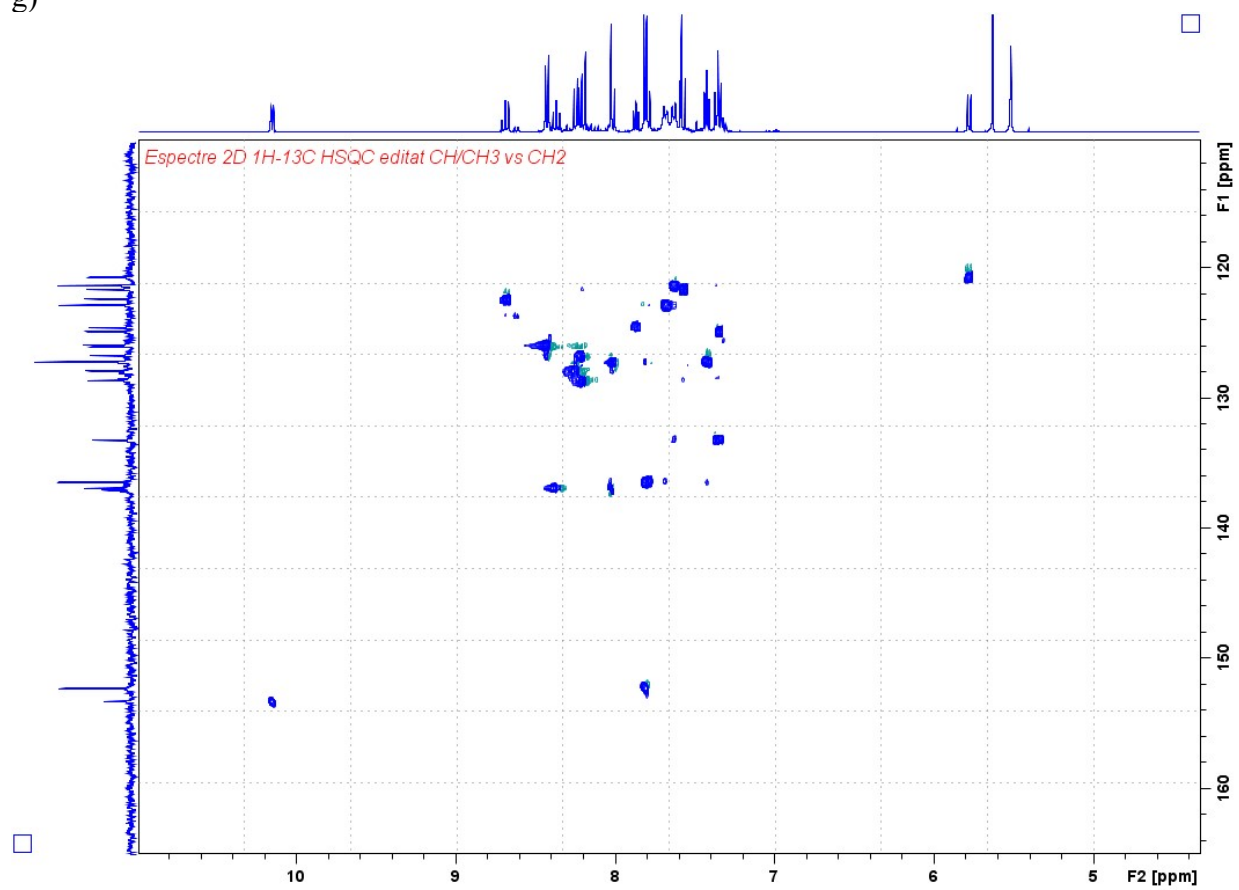

**Figure S5.** NMR spectra of *cis*-**2**, 400 MHz, CD<sub>6</sub>CO: a) <sup>13</sup>C-NMR; b) DEPT; c) COSY; d) NOESY; e) TOCSY; f) HMBC H,C; g) HSQC H,C

a)

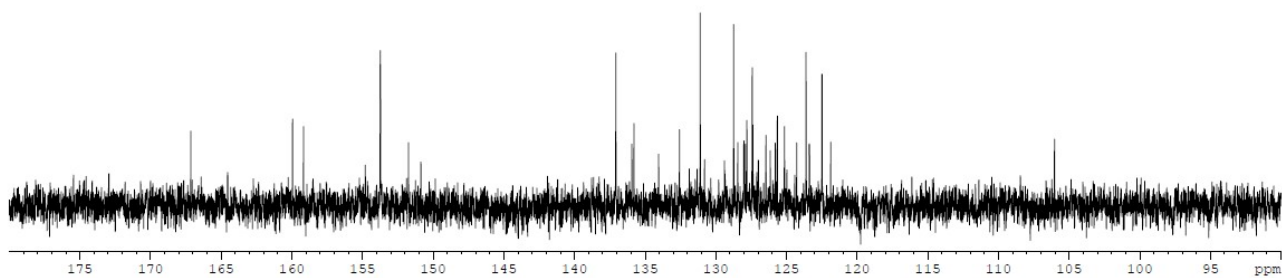

b)

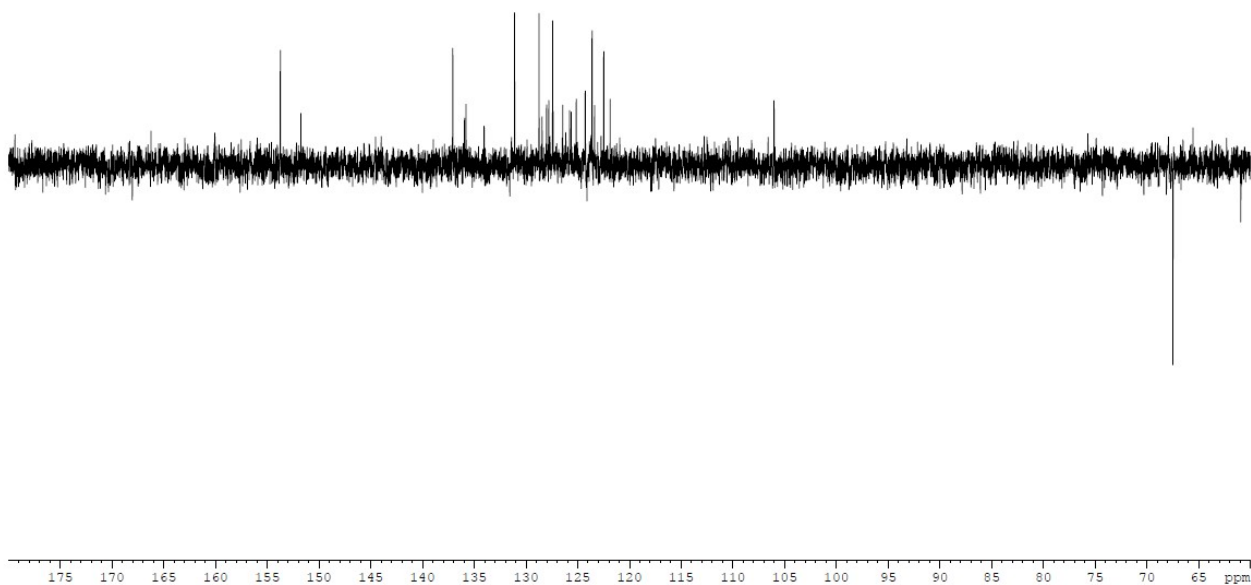

c)

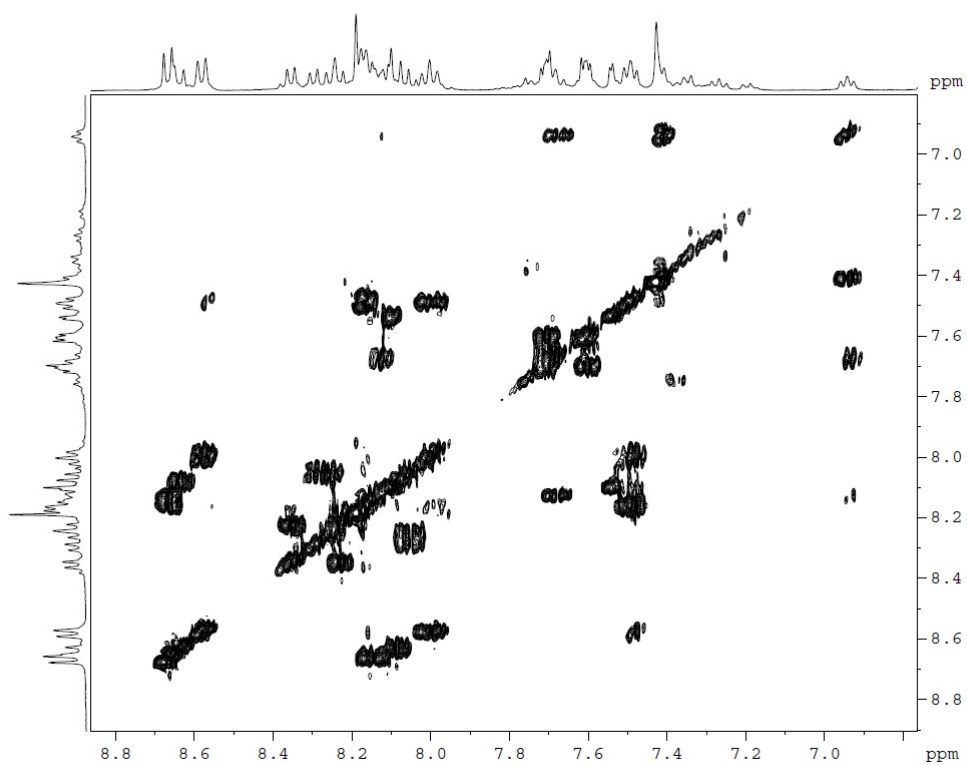

d)

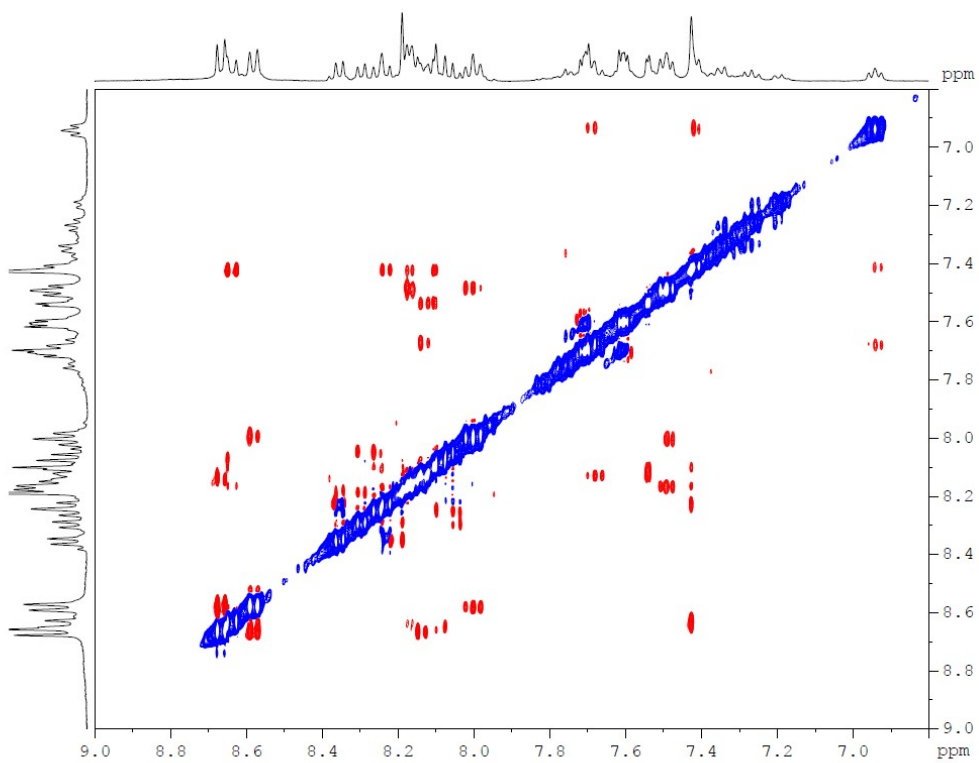



e)

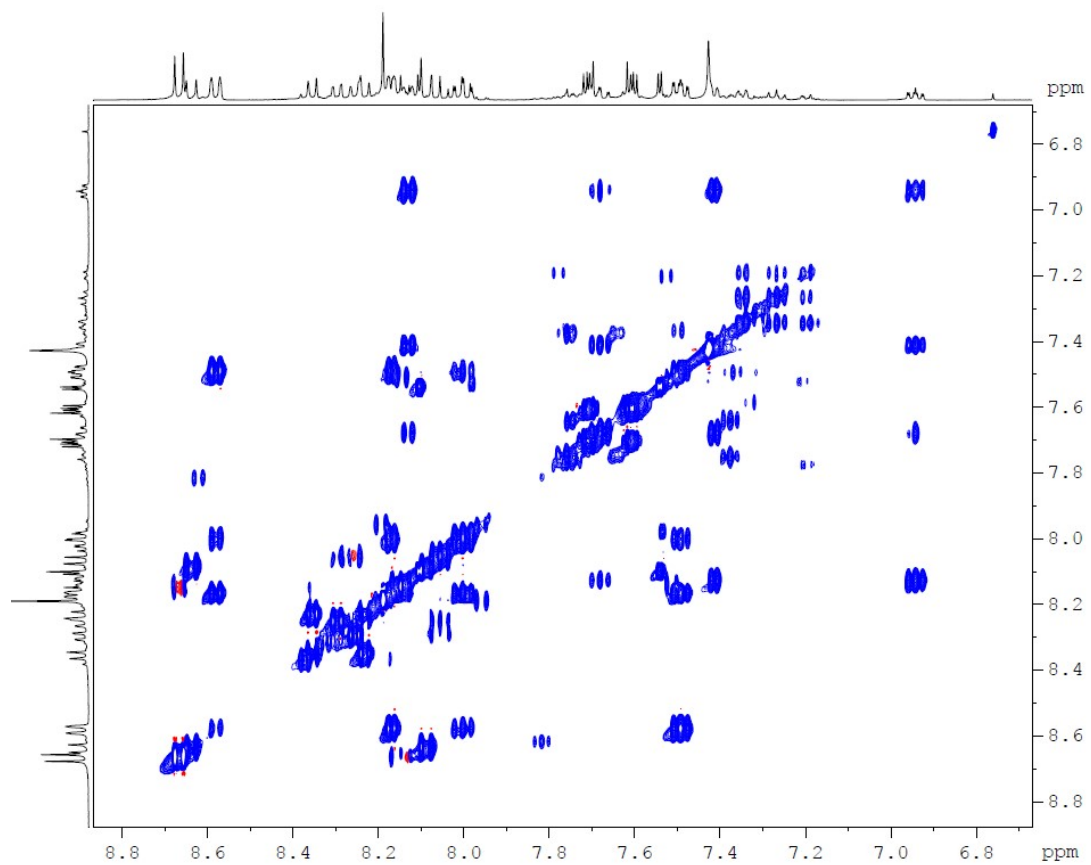

f)

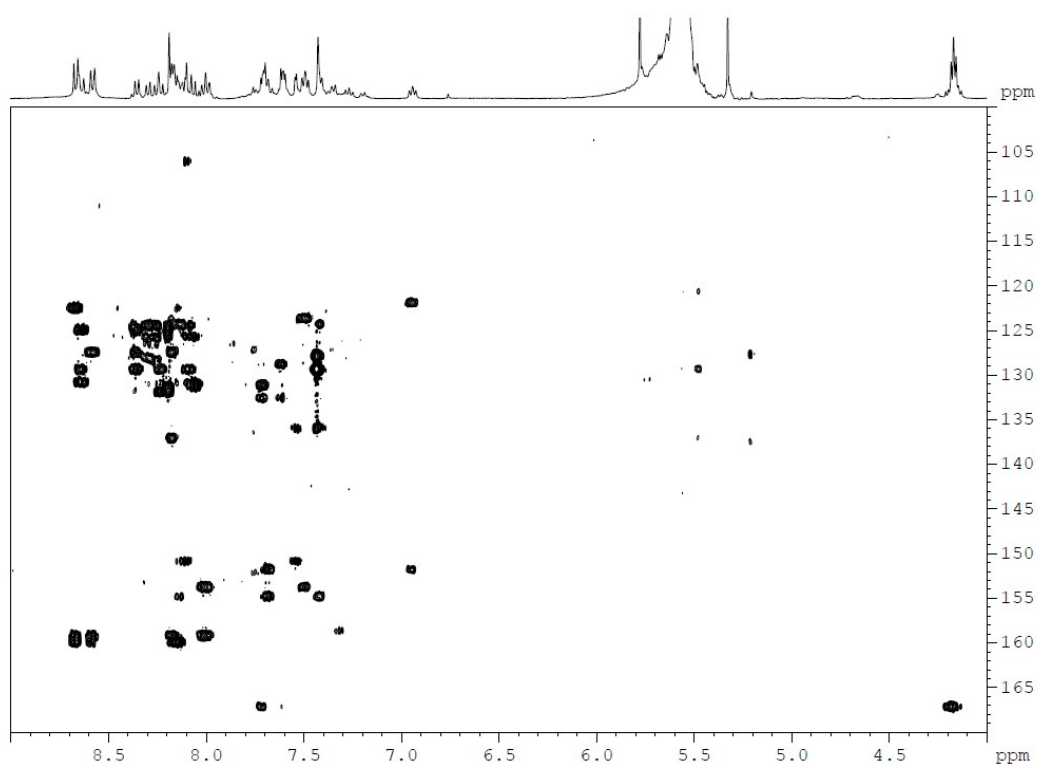

g)

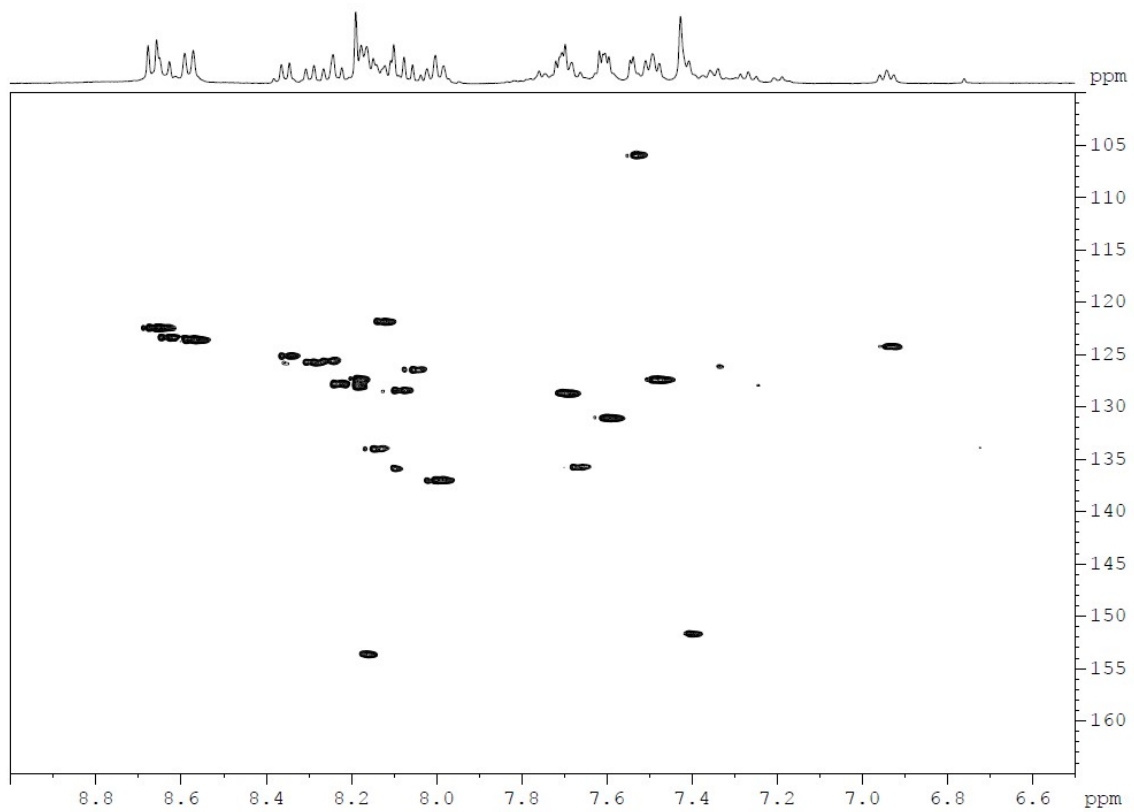

**Figure S6.** NMR spectra of *trans*-**3**, 400 MHz, MeOD: a)  $^1\text{H}$ -NMR

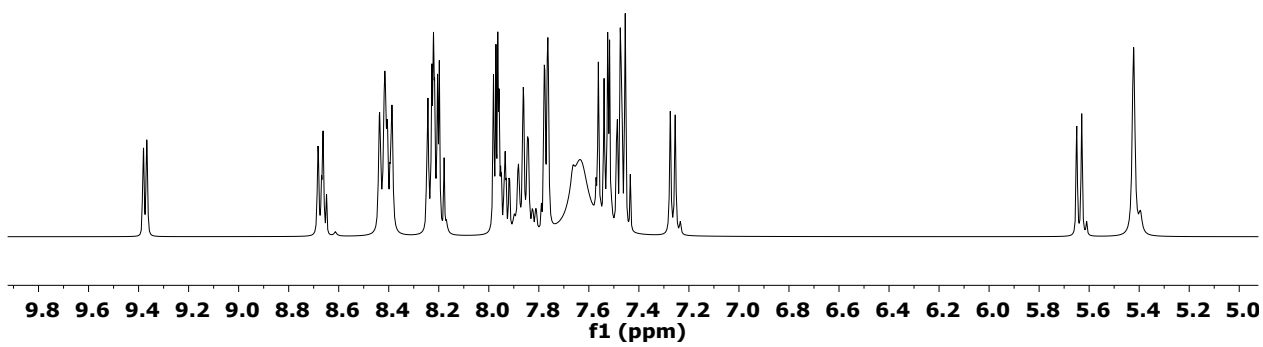

**Figure S7.** UV/Vis spectra of *trans*-2 (solid line), *cis*-2 (dotted line) in CH<sub>2</sub>Cl<sub>2</sub> and *trans*-3 (dashed line in phosphate buffer (pH=6.8)

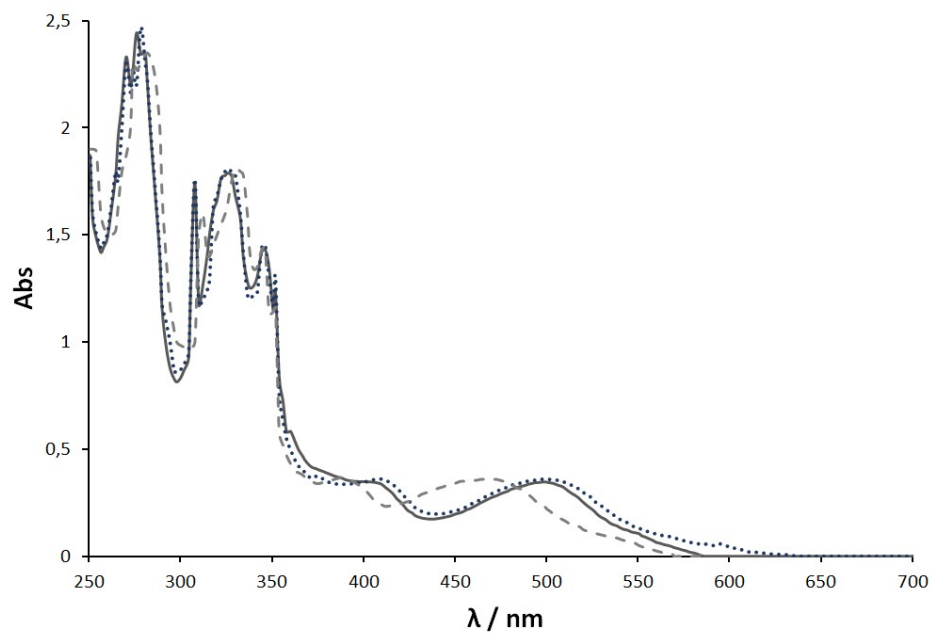

**Figure S8.** CV of a) ligand **pyrz-pyr** in  $\text{CH}_2\text{Cl}_2$  containing 0.1 M  $n\text{-Bu}_4\text{NPF}_6$  (TBAH) vs SCE. and b) *trans*-**3** in phosphate buffer (pH=6.8); c) DPV of *trans*-**3**

a)

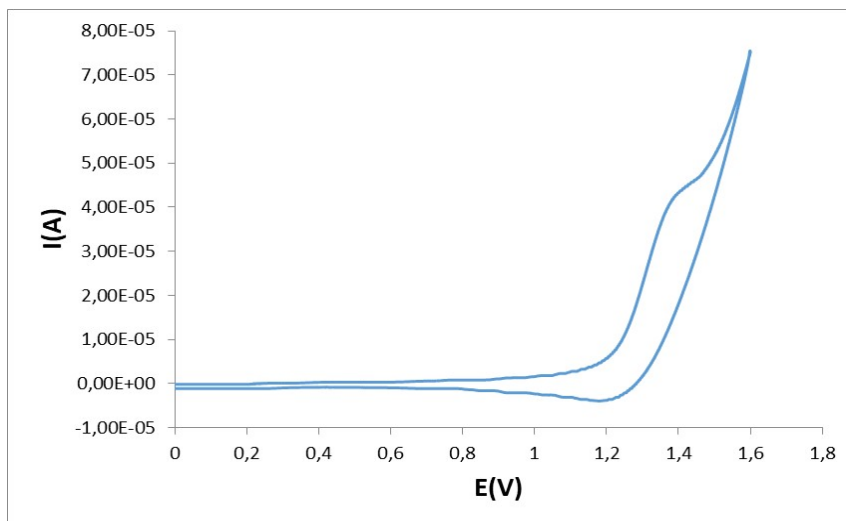

b)

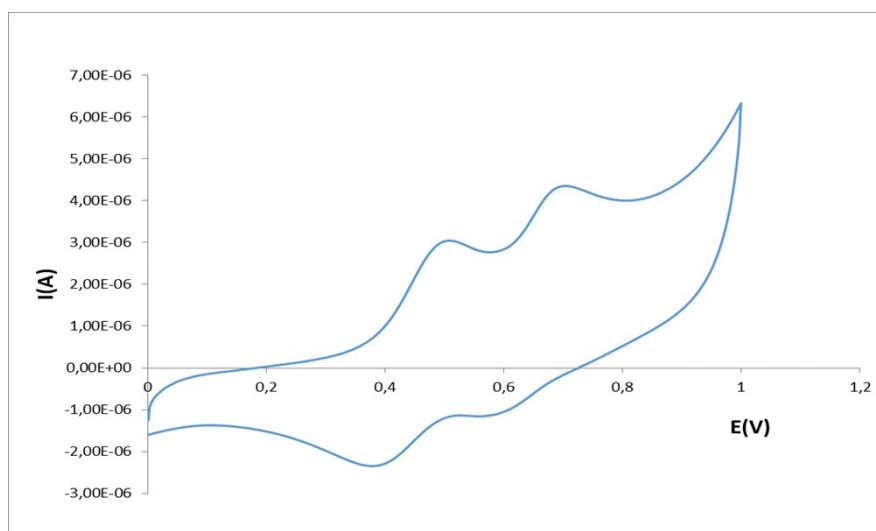

c)

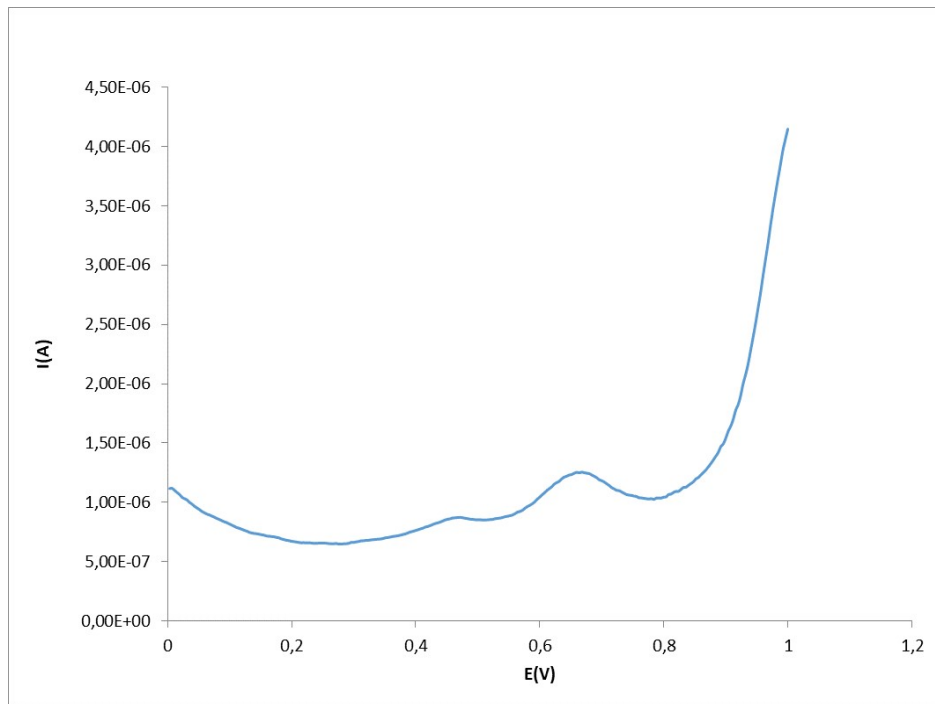

**Figure S9.** IR spectra of a) rGO (orange), b) rGO@*trans*-3 (blue)

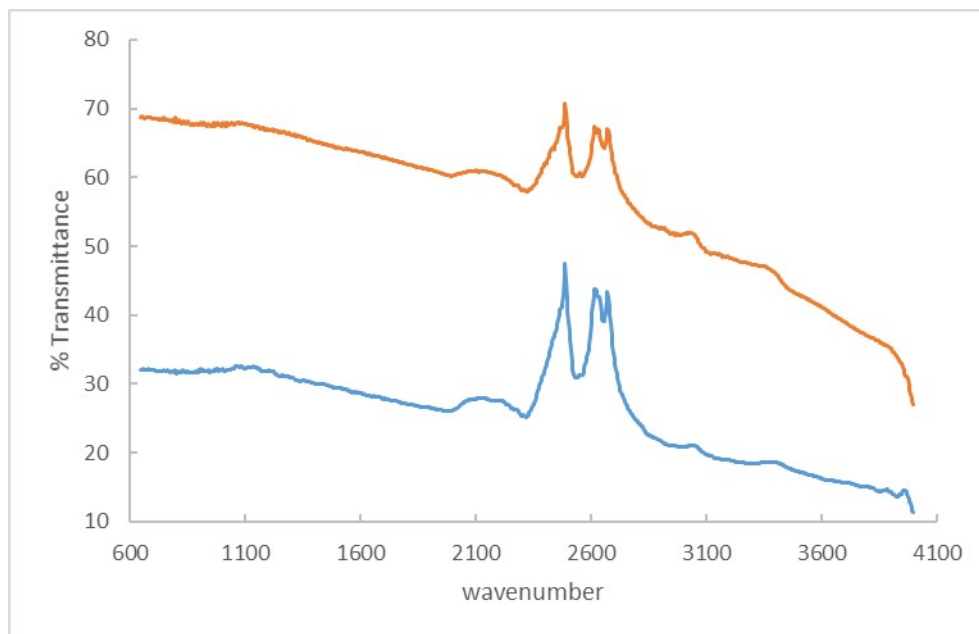

**Figure S10.** SEM images of a) rGO support and b) rGO@*trans*-3.

**a)**

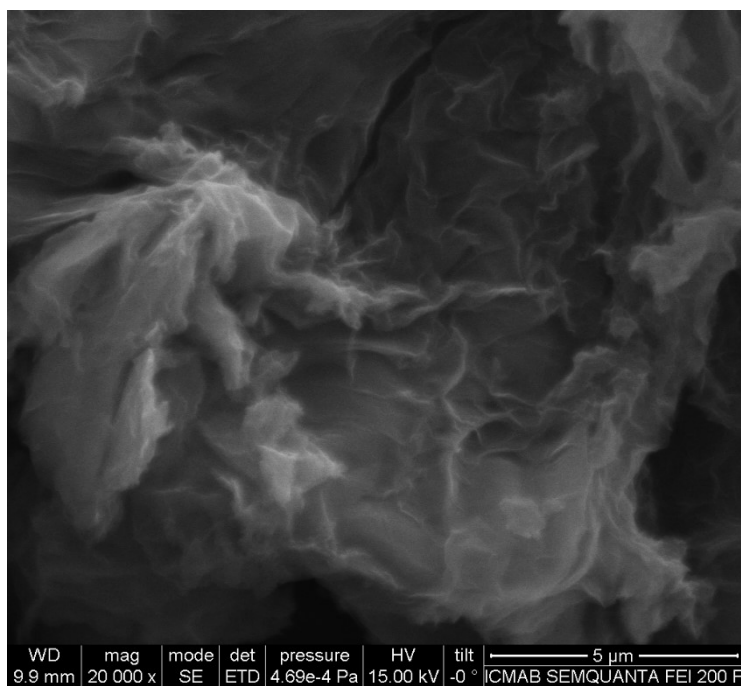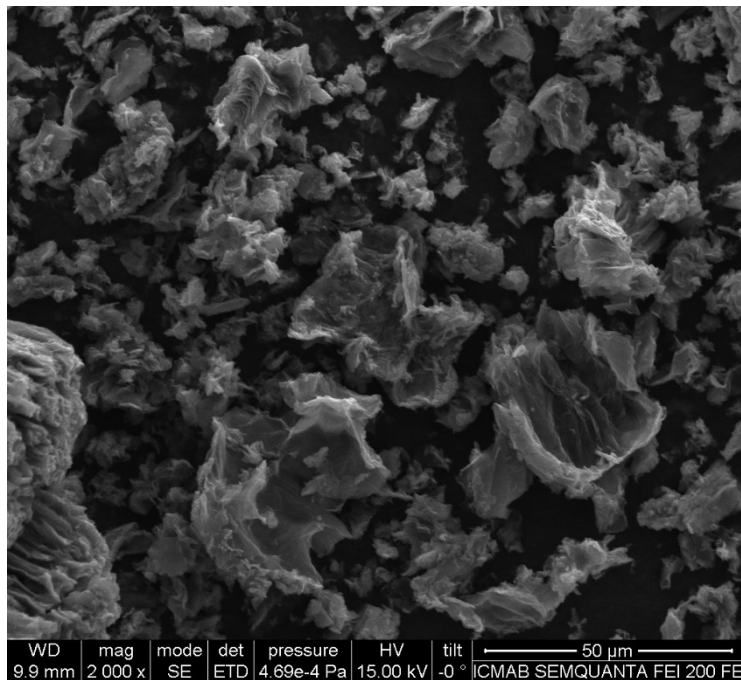



b)

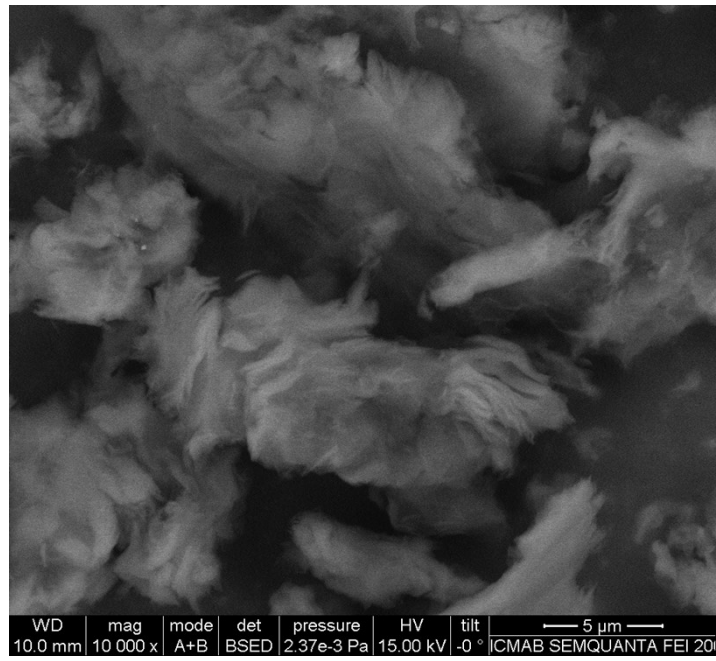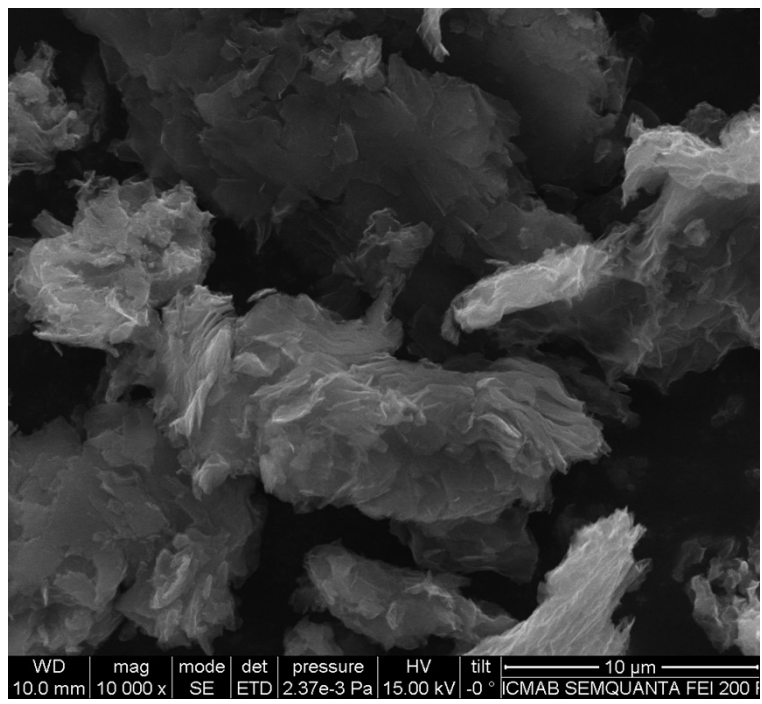

**Figure S11.** DPV of **rGO@*trans*-2** in in CH<sub>2</sub>Cl<sub>2</sub> containing 0.1 M *n*-Bu<sub>4</sub>NPF<sub>6</sub> (TBAH) vs SCE.

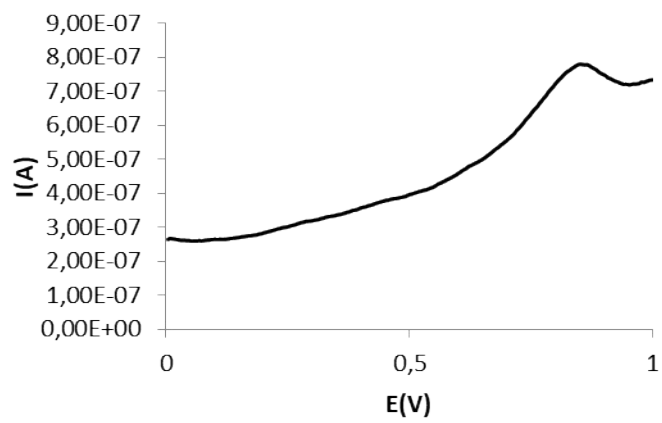

**Figure S12.** Plot of yield as a function of time for the photoredox catalysis of 1-benzylalcohol using rGO-*trans*-**3** as photocatalyst. The blue curve shows the substrate yield after 3h and 6 h of reaction time in presence of catalyst. The red curve shows the dependence of substrate yield with the reaction time after the catalyst was removed at 3h. Conditions: rGO-*trans*-**3** (0,25 mM), substrate (25 mM), Na<sub>2</sub>S<sub>2</sub>O<sub>8</sub> (75 mM), 3ml water (phosphate buffer pH 6.8), 6h h of catalysis at RT. light irradiation using a lamp with  $\lambda = 400\text{-}700\text{ nm}$ .

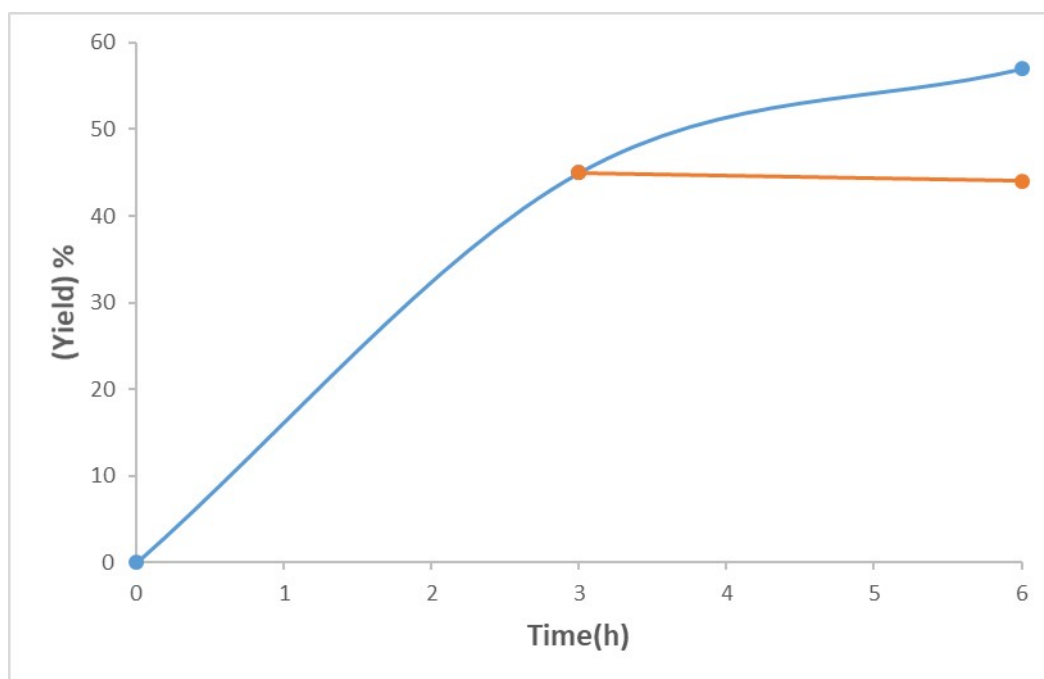

Supplement: d2qi01504h1.pdf [file d2qi01504h1.pdf]
